# Supplementary material
Source: Springer Nature journal article supplement (https://www.springermedizin.de/resource/supplementary/12885_2007_1136_MOESM3_ESM.pdf/9471202)

**A**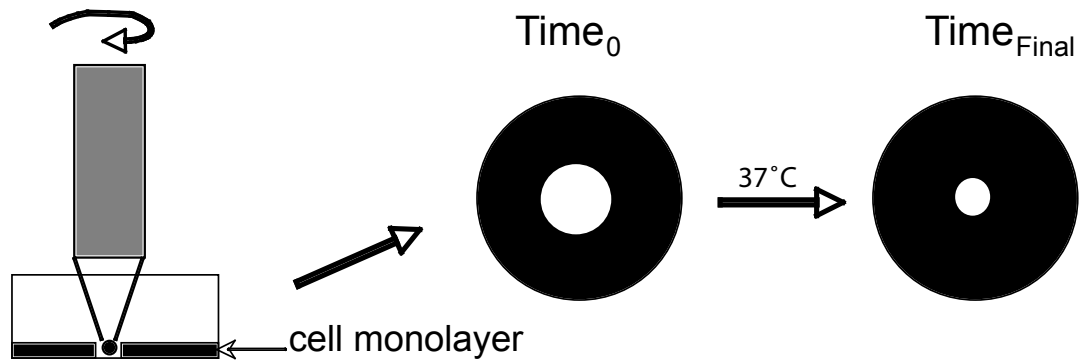**B**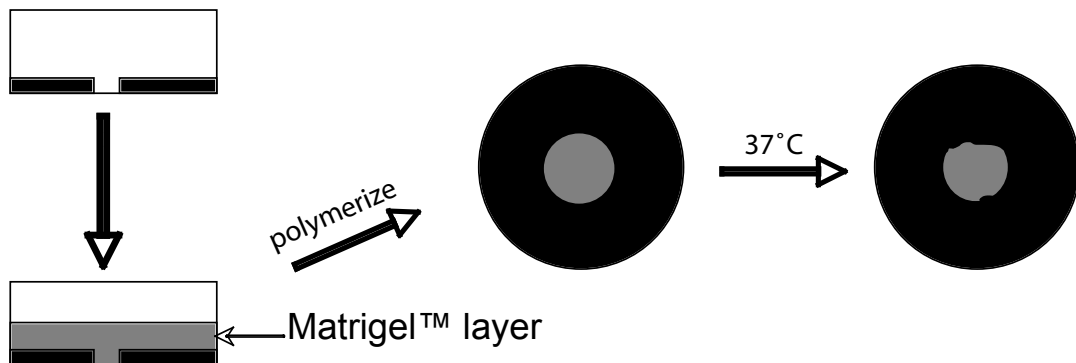

Supplement: MOESM3 [file 9471202]
